# Supplementary material
Source: publisher figshare collection journal article supplement (https://frontiersin.figshare.com/ndownloader/files/12726188)
Supplement: Supplementary file [file 12726188]

**Supplementary Table 1: List of TaqMan® Gene Expression Assays for RT-qPCR**

| Gene                     | Assay ID      | Amplicon length | NCBI Reference Sequence                                                                                 |
|--------------------------|---------------|-----------------|---------------------------------------------------------------------------------------------------------|
| <i>SLCO1A2</i>           | Hs00245360_m1 | 57              | NM_134431.2                                                                                             |
| <i>SLCO1B1</i>           | Hs00272374_m1 | 77              | NM_006446.3                                                                                             |
| <i>SLCO1B3*</i>          | Hs00251986_m1 | 69              | NM_019844.3                                                                                             |
| <i>SLCO1C1</i>           | Hs00213714_m1 | 92              | NM_017435.3                                                                                             |
| <i>SLCO2A1</i>           | Hs00194554_m1 | 87              | NM_005630.1                                                                                             |
| <i>SLCO2B1</i>           | Hs00200670_m1 | 113             | NM_007256.2                                                                                             |
| <i>SLCO3A1</i>           | Hs00203184_m1 | 89              | NM_013272.2                                                                                             |
| <i>SLCO4A1</i>           | Hs00249583_m1 | 80              | NM_016354.3                                                                                             |
| <i>SLCO4C1</i>           | Hs00698884_m1 | 77              | NM_180991.4                                                                                             |
| <i>SLCO5A1</i>           | Hs00229597_m1 | 60              | NM_030958.1                                                                                             |
| <i>SLCO6A1</i>           | Hs00542846_m1 | 63              | NM_173488.3                                                                                             |
| <i>SLCO1B7</i>           | Hs00991170_m1 | 87              | NM_001009562.4                                                                                          |
| <i>ABCA1</i>             | Hs01059118_m1 | 61              | NM_005502.3.                                                                                            |
| <i>ABCB1</i>             | Hs00184500_m1 | 67              | NM_000927                                                                                               |
| <i>ABCB2</i>             | Hs00388677_m1 | 60              | NM_000593.5                                                                                             |
| <i>ABCB3</i>             | Hs00241060_m1 | 66              | NM_000544.3                                                                                             |
| <i>ABCC2</i>             | Hs00166123_m1 | 75              | NM_000392.3                                                                                             |
| <i>ABCC3</i>             | Hs00978473_m1 | 57              | NM_001144070.1<br>(2 transcript variants)                                                               |
| <i>ABCC4</i>             | Hs00988717_m1 | 63              | NM_001105515.1                                                                                          |
| <i>ABCC10</i>            | Hs00375701_m1 | 71              | NM_001198934.1                                                                                          |
| <i>ESR1</i>              | Hs00174860_m1 | 62              | NM_000125.3<br>(4 transcript variants)                                                                  |
| <i>ESR2</i>              | Hs00230957_m  | 163             | NM_001040275.1<br>( 6 transcript variants)                                                              |
| <i>PXR/NR1I2</i>         | Hs01114267_m1 | 103             | NM_033013.2;<br>( 3 transcript variants)                                                                |
| <i>HER-2<br/>(ERBB2)</i> | Hs01001580_m1 | 60              | NM_001005862.2<br>NM_001289936.1<br>NM_001289937.1<br>NM_001289938.1<br>NM_004448.<br>(5 Ref Sequences) |
| <i>PTGS2</i>             | Hs00153133_m1 | 75              | NM_000963                                                                                               |
| <i>HPDG</i>              | Hs00960586_g1 | 58              | NM_000860.5<br>(5 transcript variants)                                                                  |
| <i>SULT1E1</i>           | Hs00960941_m1 | 137             | NM_005420.2                                                                                             |

Assays were purchased from Applied Biosystems (Thermo Fisher, Waltham, MA) for RT-qPCR.

For accurate normalization of mRNA between ovarian cancer tissue specimens we determined *ACTB* (PN 4326315E, Genbank Acc. No. NM\_001101.2), *TOP1* (Genbank Acc. No. NM\_003286), *UBC* (Genbank Acc. No. NM\_021009), and *YWHAZ* (Genbank Acc. No. NM\_003406) out of a panel of 12 housekeeping genes as appropriate reference genes in specimens from serous ovarian cancer (geNorm kit and geNorm software, PrimerDesign Ltd., Southampton, UK).

\* Detects liver-specific *SLCO1B3* and cancer-type *SLCO1B3* variant

*PTGS2*: Prostaglandin-endoperoxide synthase 2 (prostaglandin G/H synthase and cyclooxygenase), *HPDG*: Hydroxyprostaglandin dehydrogenase 15-(NAD), *SULT1E1*: Sulfotransferase family 1E, estrogen-preferring, member 1
